# Supplementary figures and images for: Evidence based guidelines for complex regional pain syndrome type 1
Source: Springer Nature journal article supplement (doi:10.1186/1471-2377-10-20), 2010-03-31

# Practical algorithm

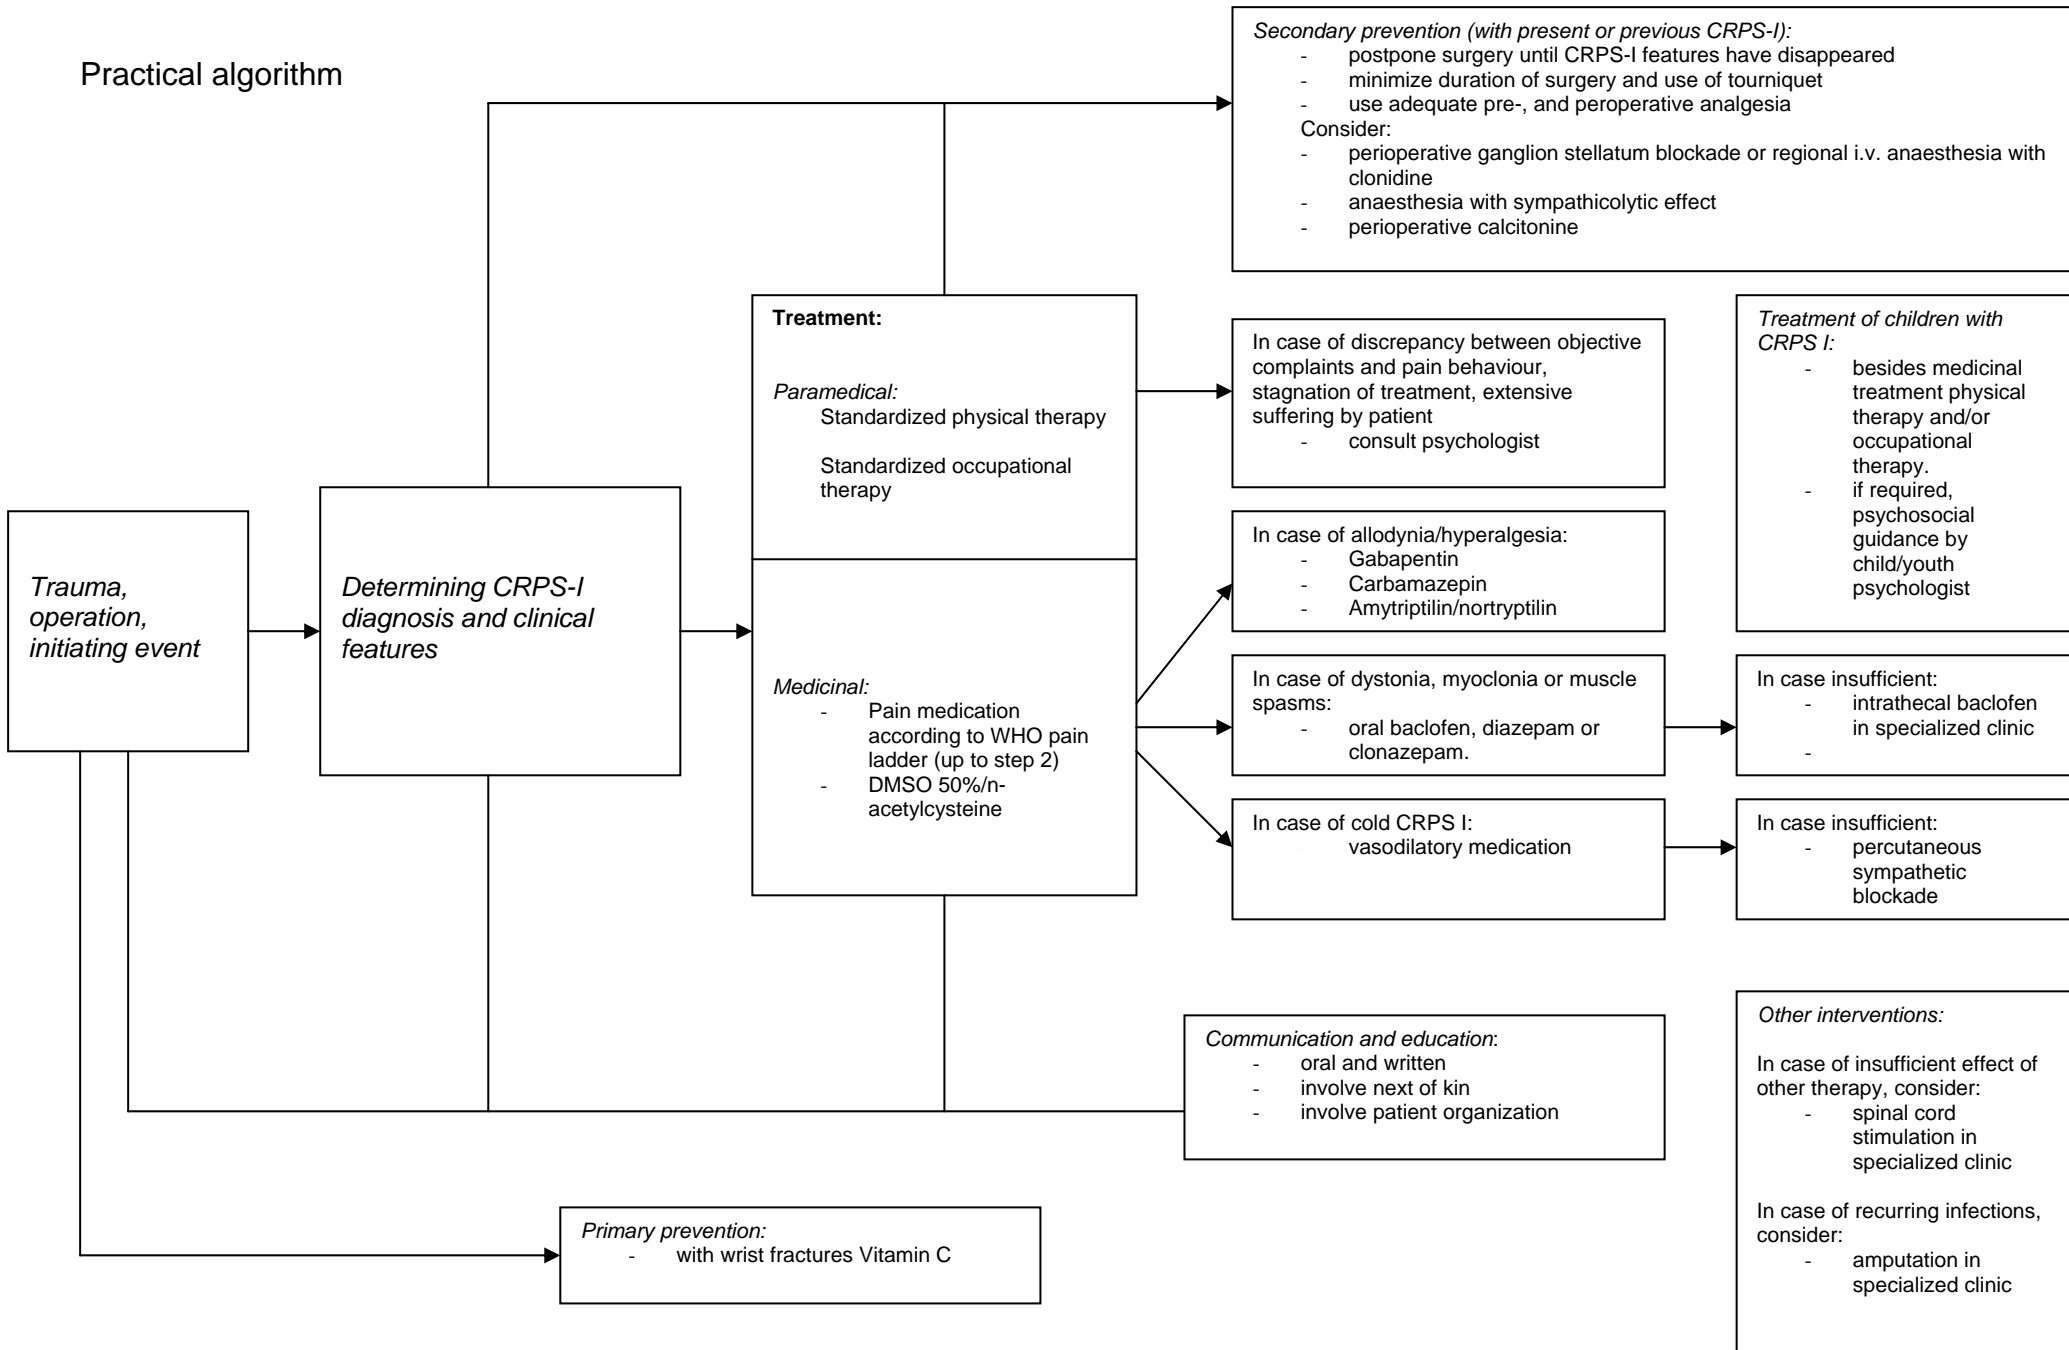

Supplement: Additional file 3 [file 1471-2377-10-20-s3.doc]
